# Supplementary material for: Bioactive Chemical Composition of Cannabis Extracts and Cannabinoid Receptors
Source: PubMed Central journal article supplement (PMC7436063; doi:10.3390/molecules25153466), 2020-07-30

**Bioactive chemical composition of cannabis extracts and cannabinoid receptors**

Yi Yang<sup>1,2</sup>, Rupali Vyawahare<sup>2</sup>, Melissa Lewis-Bakker<sup>2</sup>, Hance A. Clarke<sup>3</sup>, Albert H.C. Wong<sup>4</sup>, and

Lakshmi P. Kotra<sup>1,2,5\*</sup>

<sup>1</sup>Department of Pharmaceutical Sciences, Leslie Dan Faculty of Pharmacy, University of Toronto, Ontario, M5S 3M2, Canada

<sup>2</sup>Centre for Molecular Design and Preformulations, and Krembil Research Institute, University Health Network, Toronto, Ontario, M5G 1L7, Canada

<sup>3</sup>Department of Anesthesia and Pain Management, Toronto General Hospital, University Health Network, Toronto, Ontario, M5G 1L7, Canada

<sup>4</sup>Campbell Family Mental Health Research Institute, Centre for Addiction and Mental Health, and the Departments of Psychiatry and Pharmacology, Faculty of Medicine, University of Toronto, Toronto, Ontario, M5T 1R8, Canada

<sup>5</sup>Multi-Organ Transplant Program, Toronto General Hospital, Toronto, Ontario, M5G 1L7, Canada

**Table S1.** LLD and LLQ values for the phytocannabinoids quantified in this study.

| <b>Phytocannabinoid</b> | <b>LLD (ng/ml)</b> | <b>LLQ (ng/ml)</b> |
|-------------------------|--------------------|--------------------|
| $\Delta^9$ -THC         | 0.53 – 29.43       | 1.90 – 32.66       |
| $\Delta^9$ -THCA        | 0.28 – 6.30        | 0.83 – 8.03        |
| CBD                     | 0.10 – 9.96        | 2.43 – 15.38       |
| CBDA                    | 0.62 – 7.59        | 1.17 – 9.04        |

**Table S2.** Categorization of data prior to regression analysis.

| <b>Independent Variables:<br/>Cannabinoid Concentration</b><br>(% w/w or % w/v or % w/w <sup>2</sup> or % w/v <sup>2</sup> ) |                  |                   |                   | <b>Dependent Variable:<br/>Receptor Potency (nM)</b> |                             |                       |
|------------------------------------------------------------------------------------------------------------------------------|------------------|-------------------|-------------------|------------------------------------------------------|-----------------------------|-----------------------|
|                                                                                                                              |                  |                   |                   | <b>Sample<br/>Type</b>                               | <b>Receptor<br/>Subtype</b> | <b>Assay<br/>Mode</b> |
| CBD                                                                                                                          | THC              | CBDA              | THCA              | Cannabis<br>Extracts                                 | CB <sub>1</sub>             | Agonism               |
|                                                                                                                              |                  |                   |                   |                                                      |                             | Antagonism            |
| Or                                                                                                                           | Or               | Or                | Or                |                                                      | CB <sub>2</sub>             | Agonism               |
|                                                                                                                              |                  |                   |                   |                                                      |                             | Antagonism            |
| CBD <sup>2</sup>                                                                                                             | THC <sup>2</sup> | CBDA <sup>2</sup> | THCA <sup>2</sup> | Cannabis<br>Oil                                      | CB <sub>1</sub>             | Agonism               |
|                                                                                                                              |                  |                   |                   |                                                      |                             | Antagonism            |
|                                                                                                                              |                  |                   |                   |                                                      | CB <sub>2</sub>             | Agonism               |
|                                                                                                                              |                  |                   |                   |                                                      |                             | Antagonism            |

**Table S3:** Preliminary prediction models generated using all combinations of linear and quadratic explanatory variables, describing the relationship between chemical composition and potency at CB<sub>2</sub> as agonists for extracts obtained from dried plant samples. The model chosen as Equation 1 is underlined.

| Model #  | Equation                                                                                                                                                           | r <sup>2</sup> | RMSE  | Q <sup>2</sup> |
|----------|--------------------------------------------------------------------------------------------------------------------------------------------------------------------|----------------|-------|----------------|
| 1        | <u><math>\text{Log}(EC_{50}) = -2.782 \text{ CBD} - 1.546 * 10^{-2} \text{ THC} + 4.823 * 10^{-3} \text{ CBDA} + 1.004 * 10^{-2} \text{ THCA} + 3.664</math></u>   | 0.841          | 0.339 | 0.786          |
| 2        | $\text{Log}(EC_{50}) = -2.779 \text{ CBD} - 1.545 * 10^{-2} \text{ THC} + 8.449 * 10^{-5} \text{ CBDA}^2 + 1.003 * 10^{-2} \text{ THCA} + 3.673$                   | 0.837          | 0.343 | 0.783          |
| <u>3</u> | <u><math>\text{Log}(EC_{50}) = -2.967 \text{ CBD} - 1.649 * 10^{-2} \text{ THC} + 5.143 * 10^{-3} \text{ CBDA} + 1.363 * 10^{-4} \text{ THCA}^2 + 3.765</math></u> | 0.842          | 0.338 | 0.784          |
| 4        | $\text{Log}(EC_{50}) = -2.957 \text{ CBD} - 1.644 * 10^{-2} \text{ THC} + 8.990 * 10^{-5} \text{ CBDA}^2 + 1.359 * 10^{-4} \text{ THCA}^2 + 3.775$                 | 0.836          | 0.344 | 0.779          |
| 5        | $\text{Log}(EC_{50}) = -2.765 \text{ CBD} - 3.039 * 10^{-4} \text{ THC}^2 + 4.794 * 10^{-3} \text{ CBDA} + 9.982 * 10^{-3} \text{ THCA} + 3.656$                   | 0.820          | 0.360 | 0.754          |
| 6        | $\text{Log}(EC_{50}) = -2.763 \text{ CBD} - 3.036 * 10^{-4} \text{ THC}^2 + 8.398 * 10^{-5} \text{ CBDA}^2 + 9.973 * 10^{-3} \text{ THCA} + 3.666$                 | 0.817          | 0.364 | 0.752          |
| 7        | $\text{Log}(EC_{50}) = -2.943 \text{ CBD} - 3.234 * 10^{-4} \text{ THC}^2 + 5.102 * 10^{-3} \text{ CBDA} + 1.352 * 10^{-4} \text{ THCA}^2 + 3.756$                 | 0.819          | 0.361 | 0.749          |
| 8        | $\text{Log}(EC_{50}) = -2.933 \text{ CBD} - 3.224 * 10^{-4} \text{ THC}^2 + 8.917 * 10^{-5} \text{ CBDA}^2 + 1.348 * 10^{-4} \text{ THCA}^2 + 3.767$               | 0.814          | 0.367 | 0.746          |
| 9        | $\text{Log}(EC_{50}) = -9.420 \text{ CBD}^2 - 1.546 * 10^{-2} \text{ THC} + 4.823 * 10^{-3} \text{ CBDA} + 1.004 * 10^{-2} \text{ THCA} + 3.663$                   | 0.838          | 0.342 | 0.783          |
| 10       | $\text{Log}(EC_{50}) = -9.411 \text{ CBD}^2 - 1.545 * 10^{-2} \text{ THC} + 8.450 * 10^{-5} \text{ CBDA}^2 + 1.003 * 10^{-2} \text{ THCA} + 3.673$                 | 0.834          | 0.346 | 0.779          |
| 11       | $\text{Log}(EC_{50}) = -10.045 \text{ CBD}^2 - 1.649 * 10^{-2} \text{ THC} + 5.143 * 10^{-3} \text{ CBDA} + 1.363 * 10^{-4} \text{ THCA}^2 + 3.764$                | 0.839          | 0.341 | 0.780          |
| 12       | $\text{Log}(EC_{50}) = -10.012 \text{ CBD}^2 - 1.644 * 10^{-2} \text{ THC} + 8.990 * 10^{-5} \text{ CBDA}^2 + 1.359 * 10^{-4} \text{ THCA}^2 + 3.774$              | 0.833          | 0.347 | 0.776          |
| 13       | $\text{Log}(EC_{50}) = -9.355 \text{ CBD}^2 - 3.037 * 10^{-4} \text{ THC}^2 + 4.790 * 10^{-3} \text{ CBDA} + 9.974 * 10^{-3} \text{ THCA} + 3.656$                 | 0.817          | 0.364 | 0.749          |
| 14       | $\text{Log}(EC_{50}) = -9.345 \text{ CBD}^2 - 3.034 * 10^{-4} \text{ THC}^2 + 8.391 * 10^{-5} \text{ CBDA}^2 + 9.964 * 10^{-3} \text{ THCA} + 3.665$               | 0.813          | 0.367 | 0.747          |
| 15       | $\text{Log}(EC_{50}) = -9.954 \text{ CBD}^2 - 3.231 * 10^{-4} \text{ THC}^2 + 5.096 * 10^{-3} \text{ CBDA} + 1.351 * 10^{-4} \text{ THCA}^2 + 3.756$               | 0.816          | 0.365 | 0.743          |
| 16       | $\text{Log}(EC_{50}) = -9.921 \text{ CBD}^2 - 3.220 * 10^{-4} \text{ THC}^2 + 8.908 * 10^{-5} \text{ CBDA}^2 + 1.346 * 10^{-4} \text{ THCA}^2 + 3.766$             | 0.810          | 0.371 | 0.741          |

**Table S4:** Preliminary prediction models generated using all combinations of linear and quadratic explanatory variables, describing the relationship between chemical composition and potency at CB<sub>1</sub> as agonists for cannabis-derivative samples. The model chosen as Equation 2 is underlined.

| Model #  | Equation                                                                                                                                                      | r <sup>2</sup> | RMSE  | Q <sup>2</sup> |
|----------|---------------------------------------------------------------------------------------------------------------------------------------------------------------|----------------|-------|----------------|
| 1        | $\text{Log}(EC_{50}) = 4.561 * 10^{-2} \text{ CBD} + 3.272 * 10^{-2} \text{ THC} + 4.849 * 10^{-3} \text{ CBDA} + 1.089 * 10^{-2} \text{ THCA} + 1.795$       | 0.264          | 0.394 | -0.002         |
| 2        | $\text{Log}(EC_{50}) = 4.484 * 10^{-2} \text{ CBD} + 3.217 * 10^{-2} \text{ THC} + 1.628 * 10^{-4} \text{ CBDA}^2 + 1.071 * 10^{-2} \text{ THCA} + 1.798$     | 0.263          | 0.394 | -0.015         |
| 3        | $\text{Log}(EC_{50}) = 4.559 * 10^{-2} \text{ CBD} + 3.271 * 10^{-2} \text{ THC} + 4.847 * 10^{-3} \text{ CBDA} + 7.122 * 10^{-4} \text{ THCA}^2 + 1.795$     | 0.264          | 0.394 | -0.003         |
| 4        | $\text{Log}(EC_{50}) = 4.482 * 10^{-2} \text{ CBD} + 3.215 * 10^{-2} \text{ THC} + 1.627 * 10^{-4} \text{ CBDA}^2 + 7.001 * 10^{-4} \text{ THCA}^2 + 1.798$   | 0.263          | 0.394 | -0.015         |
| <u>5</u> | $\text{Log}(EC_{50}) = 1.421 * 10^{-1} \text{ CBD} + 5.089 * 10^{-2} \text{ THC}^2 - 2.356 * 10^{-2} \text{ CBDA} - 3.833 * 10^{-2} \text{ THCA} + 1.510$     | 0.679          | 0.260 | 0.304          |
| 6        | $\text{Log}(EC_{50}) = 1.404 * 10^{-1} \text{ CBD} + 5.008 * 10^{-2} \text{ THC}^2 - 6.453 * 10^{-4} \text{ CBDA}^2 - 4.222 * 10^{-2} \text{ THCA} + 1.511$   | 0.664          | 0.266 | 0.211          |
| 7        | $\text{Log}(EC_{50}) = 1.420 * 10^{-1} \text{ CBD} + 5.088 * 10^{-2} \text{ THC}^2 - 2.362 * 10^{-2} \text{ CBDA} - 2.492 * 10^{-3} \text{ THCA}^2 + 1.510$   | 0.679          | 0.260 | 0.303          |
| 8        | $\text{Log}(EC_{50}) = 4.214 * 10^{-2} \text{ CBD} + 9.443 * 10^{-3} \text{ THC}^2 + 1.529 * 10^{-4} \text{ CBDA}^2 + 6.582 * 10^{-4} \text{ THCA}^2 + 1.806$ | 0.275          | 0.391 | -0.082         |
| 9        | $\text{Log}(EC_{50}) = 5.424 * 10^{-3} \text{ CBD}^2 + 3.327 * 10^{-2} \text{ THC} + 4.931 * 10^{-3} \text{ CBDA} + 1.107 * 10^{-2} \text{ THCA} + 1.829$     | 0.285          | 0.389 | 0.045          |
| 10       | $\text{Log}(EC_{50}) = 5.330 * 10^{-3} \text{ CBD}^2 + 3.270 * 10^{-2} \text{ THC} + 1.654 * 10^{-4} \text{ CBDA}^2 + 1.088 * 10^{-2} \text{ THCA} + 1.831$   | 0.284          | 0.389 | 0.036          |
| 11       | $\text{Log}(EC_{50}) = 5.421 * 10^{-3} \text{ CBD}^2 + 3.326 * 10^{-2} \text{ THC} + 4.929 * 10^{-3} \text{ CBDA} + 7.242 * 10^{-4} \text{ THCA}^2 + 1.829$   | 0.285          | 0.389 | 0.044          |
| 12       | $\text{Log}(EC_{50}) = 5.328 * 10^{-3} \text{ CBD}^2 + 3.268 * 10^{-2} \text{ THC} + 1.654 * 10^{-4} \text{ CBDA}^2 + 7.117 * 10^{-4} \text{ THCA}^2 + 1.831$ | 0.284          | 0.389 | 0.036          |
| 13       | $\text{Log}(EC_{50}) = 1.339 * 10^{-2} \text{ CBD}^2 + 1.440 * 10^{-2} \text{ THC}^2 - 8.086 * 10^{-3} \text{ CBDA} - 1.306 * 10^{-2} \text{ THCA} + 1.752$   | 0.525          | 0.317 | 0.204          |
| 14       | $\text{Log}(EC_{50}) = 1.323 * 10^{-2} \text{ CBD}^2 + 1.385 * 10^{-2} \text{ THC}^2 - 2.128 * 10^{-4} \text{ CBDA}^2 - 1.392 * 10^{-2} \text{ THCA} + 1.753$ | 0.517          | 0.319 | 0.172          |
| 15       | $\text{Log}(EC_{50}) = 1.339 * 10^{-2} \text{ CBD}^2 + 1.439 * 10^{-2} \text{ THC}^2 - 8.098 * 10^{-3} \text{ CBDA} - 8.481 * 10^{-4} \text{ THCA}^2 + 1.752$ | 0.525          | 0.317 | 0.203          |

|    |                                                                                                                                 |       |       |       |
|----|---------------------------------------------------------------------------------------------------------------------------------|-------|-------|-------|
| 16 | $\text{Log}(EC_{50}) = 1.323 * 10^{-2} CBD^2 + 1.384 * 10^{-2} THC^2 - 2.131 * 10^{-4} CBDA^2 - 9.039 * 10^{-4} THCA^2 + 1.753$ | 0.517 | 0.319 | 0.171 |
|----|---------------------------------------------------------------------------------------------------------------------------------|-------|-------|-------|

**Table S5:** Preliminary prediction models generated using all combinations of linear and quadratic explanatory variables, describing the relationship between chemical composition and potency at CB<sub>1</sub> as agonists for extracts obtained from dried plant samples. The model chosen as Equation 3 is underlined.

| Model # | Equation                                                                                                                                                                    | r <sup>2</sup> | RMSE  | Q <sup>2</sup> |
|---------|-----------------------------------------------------------------------------------------------------------------------------------------------------------------------------|----------------|-------|----------------|
| 1       | <u><math>\text{Log}(EC_{50}) = 5.435 * 10^{-3} \text{ CBD} - 6.101 * 10^{-3} \text{ THC} + 4.938 * 10^{-3} \text{ CBDA} + 5.834 * 10^{-3} \text{ THCA} + 2.682</math></u>   | 0.196          | 0.601 | 0.125          |
| 2       | $\text{Log}(EC_{50}) = 5.479 * 10^{-3} \text{ CBD} - 6.151 * 10^{-3} \text{ THC} + 1.085 * 10^{-3} \text{ CBDA}^2 + 5.882 * 10^{-3} \text{ THCA} + 2.681$                   | 0.204          | 0.598 | 0.140          |
| 3       | <u><math>\text{Log}(EC_{50}) = 5.690 * 10^{-3} \text{ CBD} - 6.388 * 10^{-3} \text{ THC} + 5.171 * 10^{-3} \text{ CBDA} + 8.740 * 10^{-5} \text{ THCA}^2 + 2.699</math></u> | 0.194          | 0.602 | 0.119          |
| 4       | $\text{Log}(EC_{50}) = 5.722 * 10^{-3} \text{ CBD} - 6.423 * 10^{-3} \text{ THC} + 1.133 * 10^{-4} \text{ CBDA}^2 + 8.788 * 10^{-5} \text{ THCA}^2 + 2.698$                 | 0.202          | 0.599 | 0.134          |
| 5       | $\text{Log}(EC_{50}) = 6.157 * 10^{-3} \text{ CBD} - 8.791 * 10^{-5} \text{ THC}^2 + 5.594 * 10^{-3} \text{ CBDA} + 6.609 * 10^{-3} \text{ THCA} + 2.615$                   | 0.187          | 0.605 | 0.105          |
| 6       | $\text{Log}(EC_{50}) = 6.225 * 10^{-3} \text{ CBD} - 8.889 * 10^{-5} \text{ THC}^2 + 1.233 * 10^{-4} \text{ CBDA}^2 + 6.683 * 10^{-3} \text{ THCA} + 2.613$                 | 0.196          | 0.601 | 0.122          |
| 7       | $\text{Log}(EC_{50}) = 6.438 * 10^{-3} \text{ CBD} - 9.193 * 10^{-5} \text{ THC}^2 + 5.850 * 10^{-3} \text{ CBDA} + 9.888 * 10^{-5} \text{ THCA}^2 + 2.631$                 | 0.183          | 0.606 | 0.096          |
| 8       | $\text{Log}(EC_{50}) = 6.489 * 10^{-3} \text{ CBD} - 9.265 * 10^{-5} \text{ THC}^2 + 1.285 * 10^{-4} \text{ CBDA}^2 + 9.966 * 10^{-5} \text{ THCA}^2 + 2.629$               | 0.192          | 0.603 | 0.113          |
| 9       | $\text{Log}(EC_{50}) = 9.093 * 10^{-5} \text{ CBD}^2 - 5.939 * 10^{-3} \text{ THC} + 4.807 * 10^{-3} \text{ CBDA} + 5.680 * 10^{-3} \text{ THCA} + 2.692$                   | 0.183          | 0.606 | 0.129          |
| 10      | $\text{Log}(EC_{50}) = 9.175 * 10^{-5} \text{ CBD}^2 - 5.993 * 10^{-3} \text{ THC} + 1.057 * 10^{-4} \text{ CBDA}^2 + 5.730 * 10^{-3} \text{ THCA} + 2.691$                 | 0.191          | 0.603 | 0.144          |
| 11      | $\text{Log}(EC_{50}) = 9.552 * 10^{-5} \text{ CBD}^2 - 6.239 * 10^{-3} \text{ THC} + 5.050 * 10^{-3} \text{ CBDA} + 8.536 * 10^{-5} \text{ THCA}^2 + 2.709$                 | 0.181          | 0.607 | 0.124          |
| 12      | $\text{Log}(EC_{50}) = 9.610 * 10^{-5} \text{ CBD}^2 - 6.277 * 10^{-3} \text{ THC} + 1.107 * 10^{-4} \text{ CBDA}^2 + 8.588 * 10^{-5} \text{ THCA}^2 + 2.708$               | 0.189          | 0.604 | 0.139          |
| 13      | $\text{Log}(EC_{50}) = 1.026 * 10^{-4} \text{ CBD}^2 - 8.525 * 10^{-5} \text{ THC}^2 + 5.425 * 10^{-3} \text{ CBDA} + 6.409 * 10^{-3} \text{ THCA} + 2.628$                 | 0.172          | 0.610 | 0.109          |
| 14      | $\text{Log}(EC_{50}) = 1.039 * 10^{-4} \text{ CBD}^2 - 8.629 * 10^{-5} \text{ THC}^2 + 1.197 * 10^{-4} \text{ CBDA}^2 + 6.487 * 10^{-3} \text{ THCA} + 2.627$               | 0.182          | 0.606 | 0.126          |
| 15      | $\text{Log}(EC_{50}) = 1.078 * 10^{-4} \text{ CBD}^2 - 8.954 * 10^{-5} \text{ THC}^2 + 5.698 * 10^{-3} \text{ CBDA} + 9.631 * 10^{-5} \text{ THCA}^2 + 2.644$               | 0.169          | 0.611 | 0.102          |

|    |                                                                                                                                                                 |       |       |       |
|----|-----------------------------------------------------------------------------------------------------------------------------------------------------------------|-------|-------|-------|
| 16 | $\text{Log}(EC_{50}) = 1.087 * 10^{-4} \text{ CBD}^2 - 9.032 * 10^{-5} \text{ THC}^2 + 1.253 * 10^{-4} \text{ CBDA}^2 + 9.716 * 10^{-5} \text{ THCA}^2 + 2.643$ | 0.178 | 0.608 | 0.119 |
|----|-----------------------------------------------------------------------------------------------------------------------------------------------------------------|-------|-------|-------|



**Figure S1.** Dose-response curves for (A) CBD and CBDA, and (C)  $\Delta^9$ -THC and  $\Delta^9$ -THCA [Ref. 15] as agonists at CB<sub>1</sub> receptor, using CP-55940 as a reference compound. Panels (B) and (D) show the dose-response curves for CBD and CBDA, and  $\Delta^9$ -THC and  $\Delta^9$ -THCA as antagonists, respectively, with SR-141716 as a reference compound at CB<sub>1</sub> receptor.

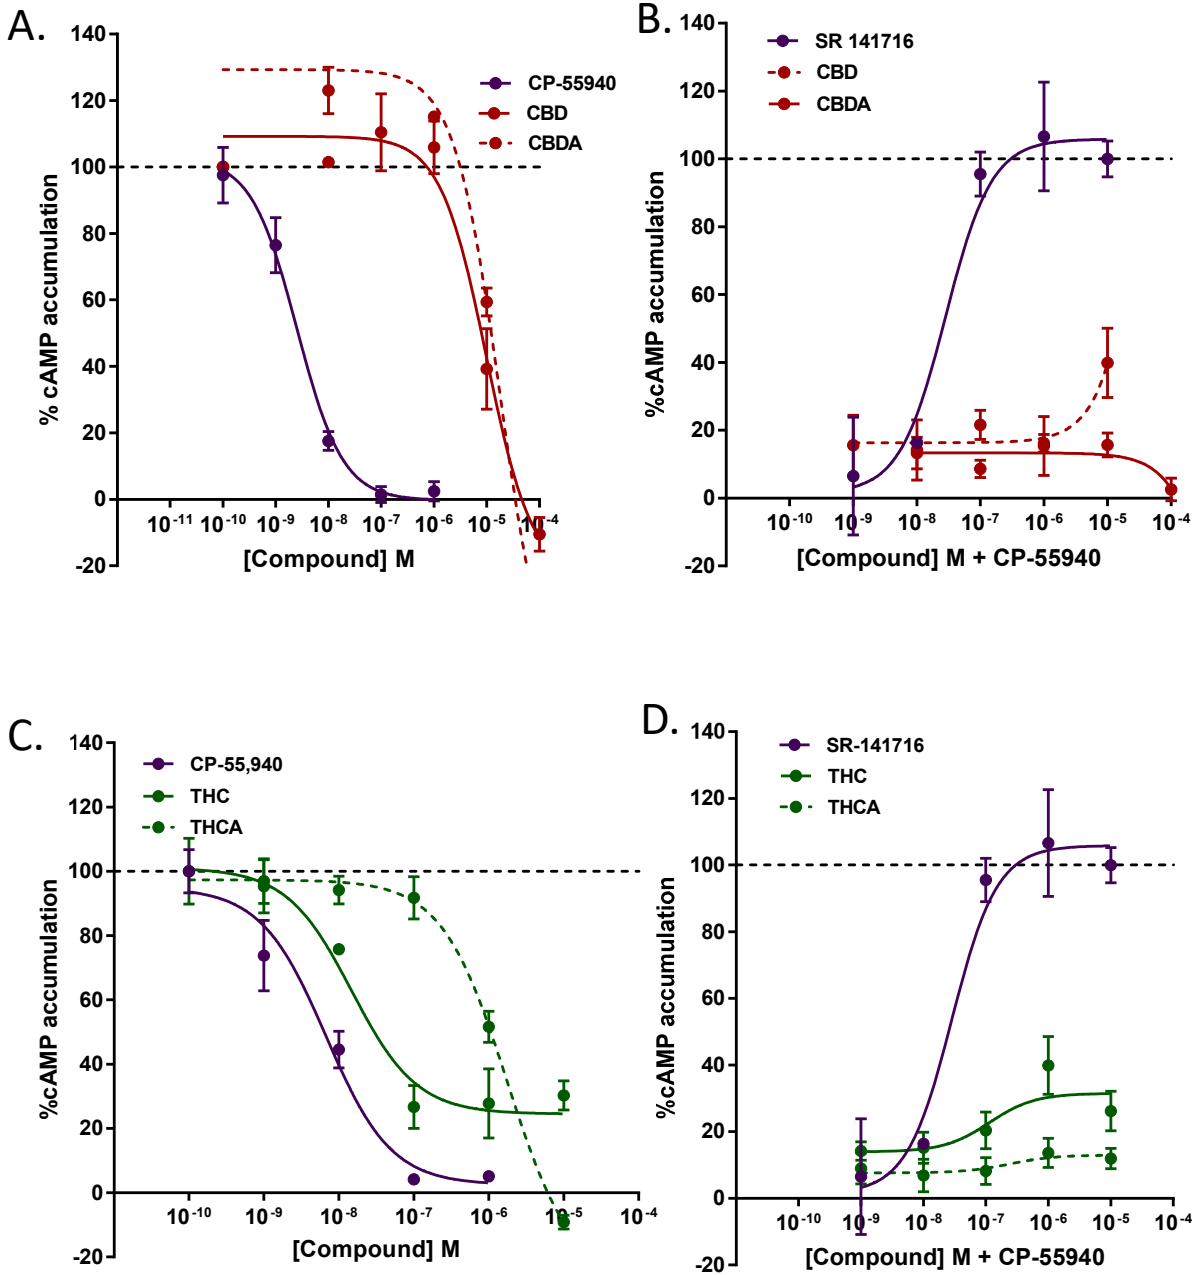

**Figure S2.** Dose-response curves for (A) CBD and CBDA, and (C)  $\Delta^9$ -THC and  $\Delta^9$ -THCA as agonists at CB<sub>2</sub> receptor, using CP-55940 as a reference compound. Panels (B) [Ref. 15] and (D) show the dose-response curves for CBD and CBDA, and  $\Delta^9$ -THC and  $\Delta^9$ -THCA as antagonists, respectively, with AM630 as a reference compound at CB<sub>2</sub> receptor.

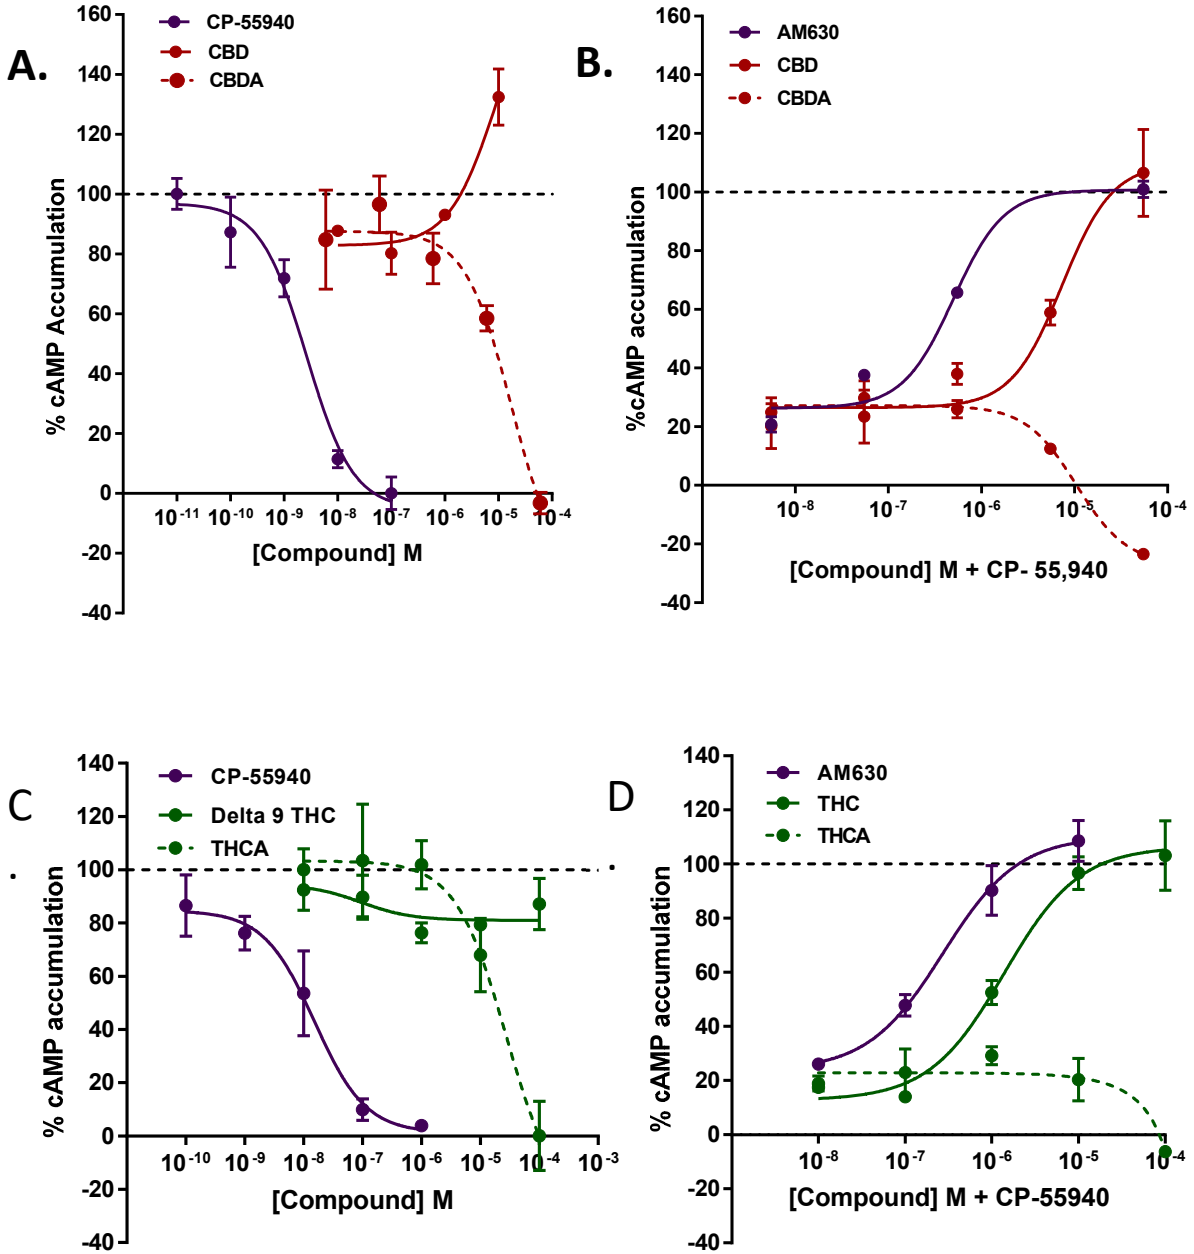

Supplement: molecules-25-03466-s001.pdf [file molecules-25-03466-s001.pdf]
